# Supplementary material
Source: PubMed Central journal article supplement (PMC3193405)
Supplement: cr2010142x1.pdf [file cr2010142x1.pdf]

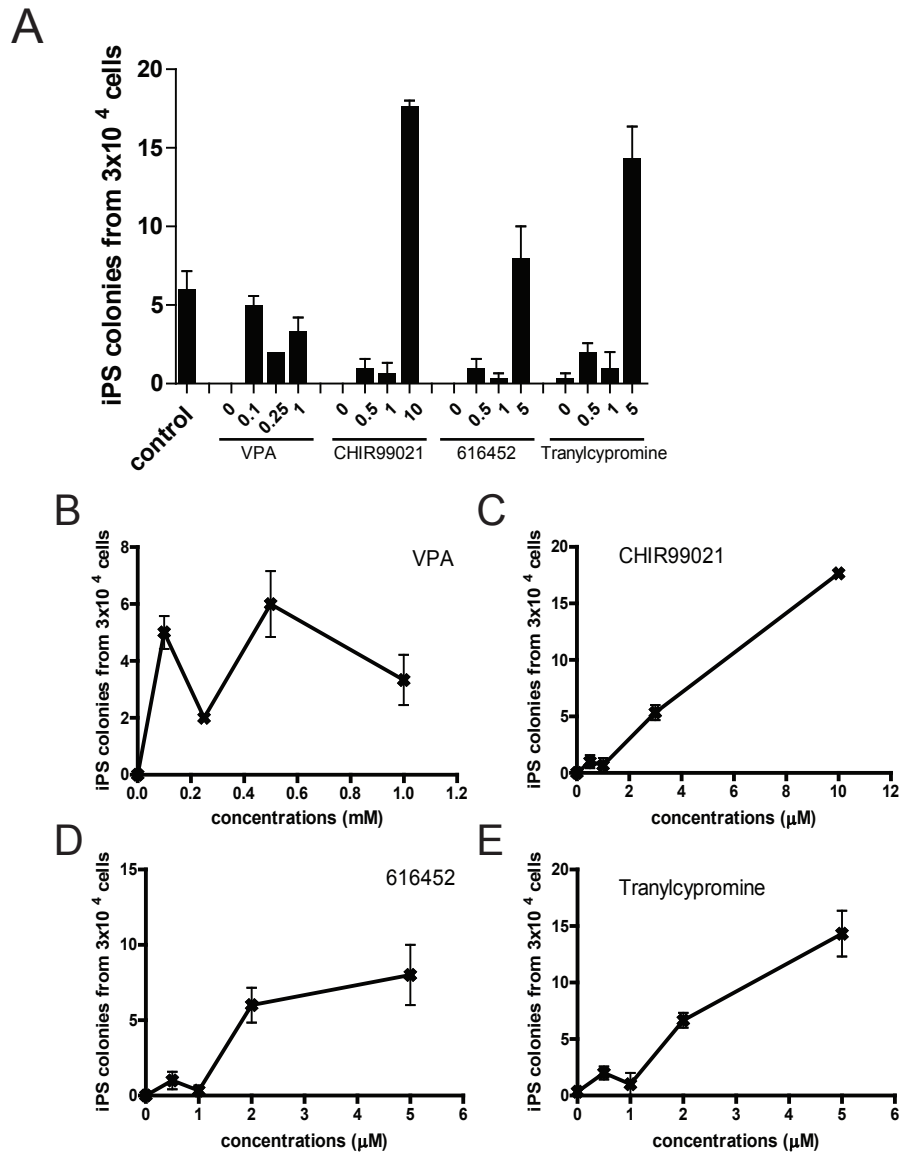

**Fig. S1. Small molecules used at different concentrations in Oct4-induced reprogramming.** In control experiments, VPA was used at 0.5mM, CHIR 99021 was used at 3μM, 616452 was used at 2μM and tranylcypromine was used at 2μM. The concentration of one small molecule was changed to the indicated concentrations independently.

- (A) Concentrations of the four small molecules in VC6T were respectively changed. "Control" indicates the original concentrations. Shown are iPSC colony numbers induced by different concentrations of VPA (0, 0.1, 0.25 and 1mM) , CHIR (0, 0.5, 1 and 10μM), 616452 (0, 0.5, 1 and 5μM), and tranylcypromine (0, 0.5, 1 and 5μM).
- (B) iPSC colony numbers induced by changed concentrations of VPA. The optimal concentration was the original one, 0.5mM.
- (C) iPSC colony numbers induced by changed concentrations of CHIR99021. The optimal concentration was 10μM.
- (D) iPSC colony numbers induced by changed concentrations of 616452. The optimal concentration was 5μM.
- (E) iPSC colony numbers induced by changed concentrations of tranylcypromine. The optimal concentration was 5μM.
