# Supplementary material
Source: PubMed Central journal article supplement (PMC3193405)
Supplement: cr2010142x2.pdf [file cr2010142x2.pdf]

A

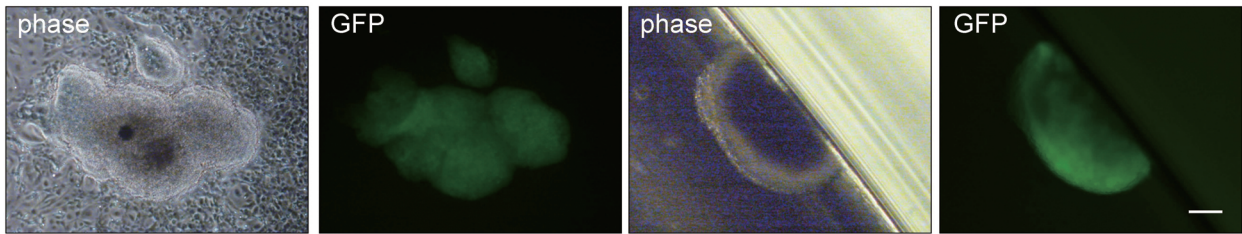

B

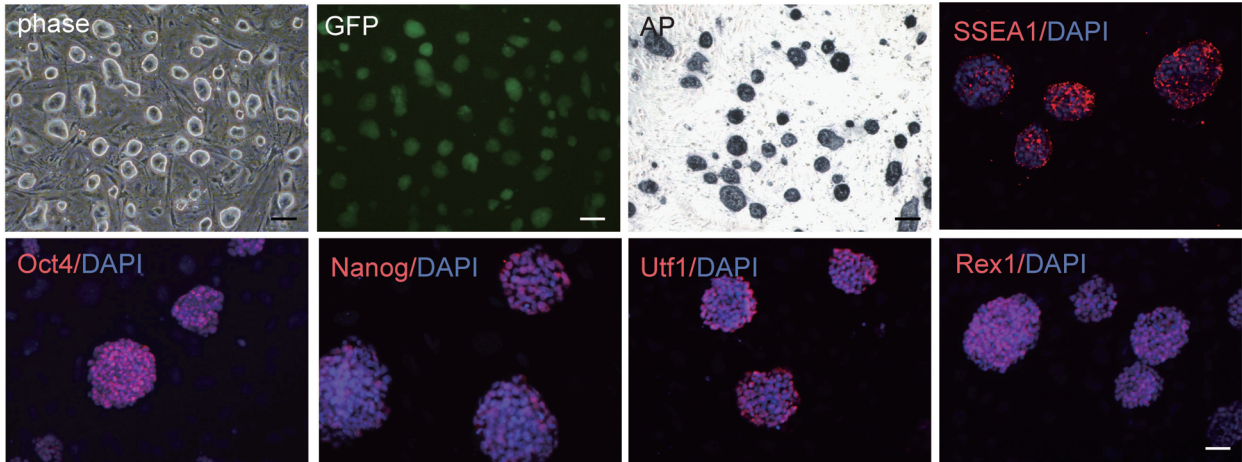

C

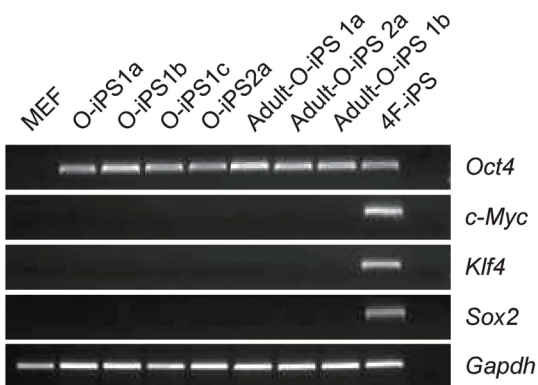

**Fig. S2. iPSCs induced from adult mouse fibroblasts by Oct4 and small molecules.**

(A) Typical iPS colonies (phase) and the related GFP fluorescence scope (GFP) observed at day 35 post-transduction. Bar, 500 $\mu$ m.

(B) iPSCs derived from adult fibroblasts maintained ESC-like morphology, AP activity and GFP positive, while expressing the pluripotency markers Oct4, Nanog, Utf1, Rex1 and SSEA1, detected by immunofluorescence. Bar, 100 $\mu$ m.

(C) Oct4-induced iPSCs from adult fibroblasts (Adult-O-iPS 1a, Adult-O-iPS 2a and Adult-O-iPS 1b) were integrated with only one exogenous reprogramming factor, Oct4, detected by genome PCR. As controls, MEFs were integrated with no reprogramming genes, and 4F-iPSCs were integrated with 4 reprogramming factors.
