# Supplementary material
Source: PubMed Central journal article supplement (PMC3193405)
Supplement: cr2010142x3.pdf [file cr2010142x3.pdf]

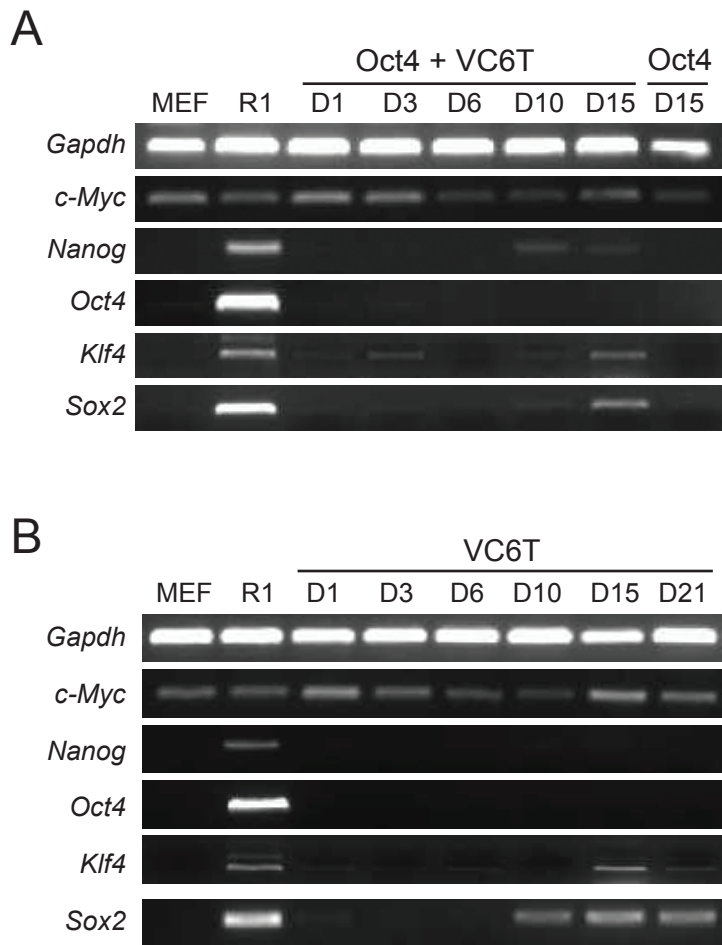

**Fig. S3. Endogenous expression of reprogramming factors in oct4-induced reprogramming.** Cells were transduced with Oct4, and treated with small molecule combination VC6T from day 0 to the indicated day.

(A) Cells were transduced with Oct4 and treated with VC6T from days 1 to 15. As a negative control, cells were transduced with Oct4 for 15 days without VC6T treatment.

(B) Cells were treated with VC6T from days 1 to 21, without any exogenous gene.
