# Supplementary material
Source: PubMed Central journal article supplement (PMC3193405)
Supplement: cr2010142x4.pdf [file cr2010142x4.pdf]

**Supplemental Table 1 Primers for RT-PCR and genome PCR test.**

| <b>Primers for RT-PCR</b>     |                                            |
|-------------------------------|--------------------------------------------|
| Endo-sox2S                    | TAG AGC TAG ACT CCG GGC GAT GA             |
| Endo-sox2A                    | TTG CCT TAA ACA AGA CCA CGA AA             |
| Endo-klf4S                    | GCG AAC TCA CAC AGG CGA GAA ACC            |
| Endo-klf4A                    | TCG CTT CCT CTT CCT CCG ACA CA             |
| Endo-cmycS                    | TGA CCT AAC TCG AGG AGG AGC TGG AAT C      |
| Endo-cmycA                    | AAG TTT GAG GCA GTT AAA ATT ATG GCT GAA GC |
| Endo-oct4S                    | ATGAAAGCCCTGCAGAAGGAGCTAGAAC               |
| Endo-oct4A                    | TCTCTAGCCCAAGCTGATTGGCGATGTG               |
| Endo-NanogS                   | CAGGAGTTTGAGGGTAGCTC                       |
| Endo-NanogA                   | CGGTTTCATCATGGTACAGTC                      |
| utf1-S                        | GGA TGT CCC GGT GAC TAC GTC TG             |
| utf1-A                        | GGC GGA TCT GGT TAT CGA AGG GT             |
| rex1-S                        | ACG AGT GGC AGT TTC TTC TTG GGA            |
| rex1-A                        | TAT GAC TCA CTT CCA GGG GGC ACT            |
| fbx15-S                       | CAA CAG CCT CAG TCC TGT CA                 |
| fbx15-A                       | TCT GTC GCA GCC AAT CAT AG                 |
| dax1-S                        | TGC TGC GGT CCA GGC CAT CAA GAG            |
| dax1-A                        | GGG CAC TGT TCA GTT CAG CGG ATC            |
| eras-S                        | ACT GCC CCT CAT CAG ACT GCT ACT            |
| eras-A                        | CAC TGC CTT GTA CTC GGG TAG CTG            |
| cripto-S                      | ATG GAC GCA ACT GTG AAC ATG ATG TTC GCA    |
| cripto-A                      | CTT TGA GGT CCT GGT CCA TCA CGT GAC CAT    |
| gapdh-S                       | CCC ACT AAC ATC AAA TGG GG                 |
| gapdh-A                       | CCT TCC ACA ATG CCA AAG TT                 |
| <b>Primers for genome PCR</b> |                                            |
| oct4-Tg-S                     | GAA GGA TGT GGT CCG AGT                    |
| oct4-Tg-A(pLL-Tg-A)           | GCA GCG TAT CCA CAT AGC GT                 |
| sox2-Tg-S                     | CAT GGG TTC GGT GGT CAA                    |
| sox2-Tg-A(pLL-Tg-A)           | GCA GCG TAT CCA CAT AGC GT                 |
| cmyc-Tg-S                     | TAC ATC CTG TCC GTC CAA GC                 |
| cmyc-Tg-A(pLL-Tg-A)           | GCA GCG TAT CCA CAT AGC GT                 |
| klf4-Tg-S                     | ACC ACT GTG ACT GGG ACG                    |
| Klf4-Tg-A(pLL-Tg-A)           | GCA GCG TAT CCA CAT AGC GT                 |
